# Supplementary material for: Rapid determination of enantiomeric ratio using fluorescent DNA or RNA aptamers
Source: Royal Society of Chemistry journal article supplement (doi:10.1039/b921267a), 2009-12-22
Supplement: b921267a.pdf [file b921267a.pdf]

Supplementary data for “Rapid Determination of Enantiomeric Ratio using Fluorescent DNA or RNA Aptamers” by Eric L. Null and Yi Lu\*<sup>a</sup>

As described in the work, Figure 4 was repeated to check the fit of the equation to data points not used in generation of the figure. New data points (including those not used in fitting) were generated. The same fitting procedure was applied as described in the work. The resulting fit is shown below as Supplementary Equation 1 and was used to generate Supplementary Figure 1 seen below.

$$\frac{F}{F_0} = 5.12 - 2.18 * (0.0088)^{\theta_v/\theta_D} \quad (1)$$

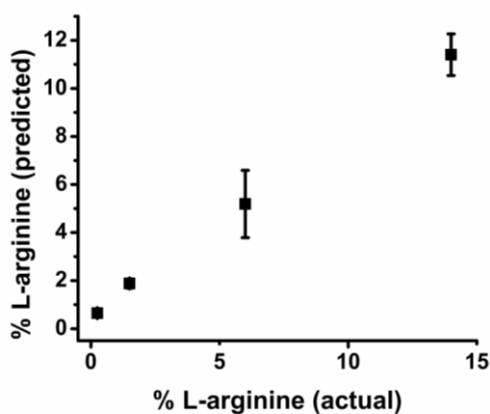

**Figure S1.** Predicted % L-arginine vs actual % L-arginine at 10 mM total arginine. Predicted value was calculated using the experimentally determined  $F/F_0$  as the input to the fit equation and the output (theta ratio) was converted to % L-arginine.
